# Supplementary material for: No Association between Low-Calorie Sweetener (LCS) Use and Overall Cancer Risk in the Nationally Representative Database in the US: Analyses of NHANES 1988–2018 Data and 2019 Public-Use Linked Mortality Files
Source: MDPI journal article supplement (doi:10.3390/nu14234957), 2022-11-22
Supplement: s1 [file s1]

# SUPPLEMENTAL TABLES S1-S3

## No association between low-calorie sweetener (LCS) use and overall cancer risk in the nationally representative database in the US: Analyses of NHANES 1988-2018 data and 2019 Pub-lic-Use Linked Mortality Files

Victor L. Fulgoni III<sup>1</sup> and Adam Drewnowski<sup>2\*</sup>

<sup>1</sup> Nutrition Impact LLC, Battle Creek, MI 49014, USA; vic3rd@aol.com

<sup>3</sup> Center for Public Health Nutrition, University of Washington, Box 353410, Seattle, WA 98195, USA

\* Correspondence: adamdrew@uw.edu

Supplemental Table S1. Cancer Mortality Beta Coefficients for Associations with Aspartame and Saccharin, 1988-1994.

|                   | levels             | 19+ y               |         | 19-50 y             |         | 51+ y               |         |
|-------------------|--------------------|---------------------|---------|---------------------|---------|---------------------|---------|
| Modeling Variable |                    | HR (LCL 95, UCL 95) | P       | HR (LCL 95, UCL 95) | P       | HR (LCL 95, UCL 95) | P       |
| ASPARTAME         |                    |                     |         |                     |         |                     |         |
| Age               |                    | 1.09 (1.08, 1.10)   | <0.0001 | 1.10 (1.09, 1.12)   | <0.0001 | 1.07 (1.05, 1.08)   | <0.0001 |
| Aspartame Intake  | Quartile = 1       | ref                 |         |                     |         |                     |         |
|                   | Quartile = 2       | 0.70 (0.49, 0.99)   | 0.0448  | 0.38 (0.18, 0.81)   | 0.0136  | 0.86 (0.61, 1.23)   | 0.4122  |
|                   | Quartile = 3       | 0.72 (0.49, 1.06)   | 0.0951  | 0.57 (0.26, 1.23)   | 0.1475  | 0.65 (0.37, 1.14)   | 0.1304  |
|                   | Quartile = 4       | 1.32 (0.94, 1.85)   | 0.1055  | 1.54 (0.90, 2.61)   | 0.1104  | 0.99 (0.68, 1.44)   | 0.9739  |
| Gender            | Female             | ref                 |         | ref                 |         | ref                 |         |
|                   | Male               | 1.34 (1.10, 1.63)   | 0.0040  | 1.03 (0.70, 1.52)   | 0.8656  | 1.56 (1.29, 1.89)   | <0.0001 |
| Ethnicity         | NH white           | ref                 |         |                     |         |                     |         |
|                   | Black              | 1.04 (0.88, 1.23)   | 0.6300  | 1.01 (0.78, 1.32)   | 0.9126  | 1.09 (0.86, 1.39)   | 0.4478  |
|                   | Mexican American   | 0.74 (0.61, 0.91)   | 0.0057  | 0.67 (0.45, 0.99)   | 0.0469  | 0.83 (0.61, 1.13)   | 0.2258  |
|                   | Other Hispanic     | 0.46 (0.22, 0.96)   | 0.0383  | 0.23 (0.06, 0.94)   | 0.0405  | 0.63 (0.28, 1.40)   | 0.2534  |
|                   | Other              | 0.68 (0.33, 1.37)   | 0.2734  | 0.67 (0.20, 2.24)   | 0.5076  | 0.71 (0.30, 1.71)   | 0.4403  |
| Education         | ≤ HS               | ref                 |         |                     |         |                     |         |
|                   | Some College       | 1.11 (0.86, 1.44)   | 0.4181  | 0.67 (0.42, 1.06)   | 0.0876  | 1.59 (1.19, 2.12)   | 0.0022  |
|                   | ≥ Bachelors Degree | 0.80 (0.62, 1.03)   | 0.0800  | 0.75 (0.50, 1.14)   | 0.1781  | 0.80 (0.56, 1.13)   | 0.1967  |
| Current Smoking   | No                 | ref                 |         | REF                 |         | ref                 |         |
|                   | Yes                | 2.52 (2.03, 3.13)   | <0.0001 | 2.21 (1.57, 3.11)   | <0.0001 | 2.55 (1.98, 3.27)   | <0.0001 |
|                   |                    |                     |         |                     |         |                     |         |
| Alcohol (iui gm)  | continuous         | 1.00 (1.00, 1.01)   | 0.0886  | 1.00 (1.00, 1.01)   | 0.0979  | 1.00 (0.99, 1.01)   | 0.8245  |
| Physical Activity | Sedentary          | ref                 |         |                     |         |                     |         |
|                   | Moderate           | 0.79 (0.64, 0.99)   | 0.0402  | 0.71 (0.51, 0.99)   | 0.0438  | 0.89 (0.67, 1.20)   | 0.4443  |
|                   | Vigorous           | 0.58 (0.44, 0.75)   | 0.0001  | 0.56 (0.35, 0.89)   | 0.0157  | 0.64 (0.48, 0.85)   | 0.0027  |
| BMI (kg/m**2)     | Continuous         | 1.02 (1.00, 1.04)   | 0.0444  | 1.02 (0.99, 1.05)   | 0.2639  | 1.01 (0.99, 1.04)   | 0.2518  |

| SACCHARIN         |                    |                   |                   |                   |                   |                   |                   |
|-------------------|--------------------|-------------------|-------------------|-------------------|-------------------|-------------------|-------------------|
|                   | Age                | 1.09 (1.08, 1.09) | <b>&lt;0.0001</b> | 1.10 (1.08, 1.12) | <b>&lt;0.0001</b> | 1.06 (1.05, 1.08) | <b>&lt;0.0001</b> |
| Gender            | Female             | REF               |                   |                   |                   |                   |                   |
|                   | Male               | 1.35 (1.11, 1.64) | <b>0.0030</b>     | 1.10 (0.75, 1.60) | 0.6239            | 1.55 (1.28, 1.88) | <b>&lt;0.0001</b> |
| Saccharin Intake  | Quartile = 1       | REF               |                   |                   |                   |                   |                   |
|                   | Quartile = 2       | 1.11 (0.77, 1.59) | 0.5773            | 1.09 (0.51, 2.32) | 0.8205            | 0.90 (0.57, 1.43) | 0.6574            |
|                   | Quartile = 3       | 0.96 (0.61, 1.51) | 0.8458            | 1.32 (0.68, 2.56) | 0.4028            | 0.87 (0.59, 1.29) | 0.4855            |
|                   | Quartile = 4       | 0.84 (0.57, 1.24) | 0.3836            | 0.91 (0.50, 1.65) | 0.7524            | 0.77 (0.47, 1.25) | 0.2797            |
| Ethnicity         | White              | REF               |                   |                   |                   |                   |                   |
|                   | Black              | 1.04 (0.88, 1.24) | 0.6275            | 1.03 (0.78, 1.36) | 0.8287            | 1.10 (0.87, 1.41) | 0.4210            |
|                   | Mexican American   | 0.75 (0.61, 0.92) | <b>0.0062</b>     | 0.69 (0.46, 1.04) | 0.0730            | 0.83 (0.61, 1.13) | 0.2294            |
|                   | Other Hispanic     | 0.46 (0.22, 0.97) | 0.0413            | 0.25 (0.06, 0.96) | 0.0433            | 0.63 (0.28, 1.40) | 0.2489            |
|                   | Other              | 0.69 (0.34, 1.41) | 0.3042            | 0.72 (0.21, 2.43) | 0.5911            | 0.71 (0.30, 1.72) | 0.4426            |
| Education         | ≤ HS               | REF               |                   |                   |                   |                   |                   |
|                   | Some College       | 1.11 (0.85, 1.44) | 0.4419            | 0.67 (0.42, 1.06) | 0.0835            | 1.59 (1.19, 2.11) | <b>0.0022</b>     |
|                   | ≥ Bachelors Degree | 0.79 (0.62, 1.02) | 0.0689            | 0.70 (0.48, 1.04) | 0.0759            | 0.80 (0.57, 1.12) | 0.1917            |
| Current Smoking   | No                 | REF               |                   |                   |                   |                   |                   |
|                   | Yes                | 2.56 (2.07, 3.17) | <b>&lt;0.0001</b> | 2.27 (1.63, 3.16) | <b>&lt;0.0001</b> | 2.58 (2.01, 3.30) | <b>&lt;0.0001</b> |
| Alcohol (iui gm)  | continuous         | 1.00 (1.00, 1.01) | 0.0955            | 1.00 (1.00, 1.01) | 0.0994            | 1.00 (0.99, 1.01) | 0.7330            |
| Physical Activity | Sedentary          | REF               |                   |                   |                   |                   |                   |
|                   | Moderate           | 0.80 (0.64, 1.00) | 0.0461            | 0.71 (0.51, 0.99) | 0.0426            | 0.90 (0.67, 1.22) | 0.4926            |
|                   | Vigorous           | 0.58 (0.44, 0.75) | <b>0.0001</b>     | 0.55 (0.35, 0.87) | 0.0121            | 0.64 (0.48, 0.86) | <b>0.0035</b>     |
|                   |                    |                   |                   |                   |                   |                   |                   |
| BMI (kg/m**2)     | Continuous         | 1.02 (1.00, 1.04) | 0.0490            | 1.02 (0.98, 1.05) | 0.3039            | 1.01 (0.99, 1.04) | 0.2401            |

**iui: individual usual intake**

Supplemental Table S2. Cancer Mortality Beta Coefficients for Associations with Low Calorie Sweeteners, 1988-1994.

|                         | Modeling Variable  | 19+ y               |         | 19-50 y             |         | 51+ y               |         |
|-------------------------|--------------------|---------------------|---------|---------------------|---------|---------------------|---------|
|                         |                    | HR (LCL 95, UCL 95) | P       | HR (LCL 95, UCL 95) | P       | HR (LCL 95, UCL 95) | P       |
|                         | Age                | 1.09 (1.08, 1.09)   | <0.0001 | 1.10 (1.08, 1.12)   | <0.0001 | 1.07 (1.05, 1.08)   | <0.0001 |
| LCS Intake              | Quartile = 1       | REF                 |         |                     |         |                     |         |
|                         | Quartile = 2       | 0.96 (0.70, 1.31)   | 0.8044  | 0.75 (0.38, 1.48)   | 0.4039  | 0.90 (0.65, 1.24)   | 0.5022  |
|                         | Quartile = 3       | 0.75 (0.54, 1.05)   | 0.0963  | 0.82 (0.43, 1.58)   | 0.5524  | 0.78 (0.56, 1.08)   | 0.1308  |
|                         | Quartile = 4       | 1.15 (0.85, 1.57)   | 0.3600  | 1.29 (0.77, 2.15)   | 0.3308  | 1.04 (0.69, 1.56)   | 0.8568  |
| Gender                  | Female             | REF                 |         |                     |         |                     |         |
|                         | Male               | 1.34 (1.10, 1.62)   | 0.0042  | 1.06 (0.73, 1.54)   | 0.7419  | 1.56 (1.28, 1.89)   | <0.0001 |
| Ethnicity               | White              | REF                 |         |                     |         |                     |         |
|                         | Black              | 1.04 (0.88, 1.24)   | 0.6350  | 1.02 (0.77, 1.34)   | 0.8883  | 1.10 (0.86, 1.40)   | 0.4502  |
|                         | Mexican American   | 0.75 (0.61, 0.91)   | 0.0058  | 0.68 (0.46, 1.02)   | 0.0590  | 0.83 (0.61, 1.13)   | 0.2345  |
|                         | Other Hispanic     | 0.46 (0.22, 0.97)   | 0.0408  | 0.24 (0.06, 0.95)   | 0.0428  | 0.63 (0.28, 1.41)   | 0.2548  |
|                         | Other              | 0.68 (0.33, 1.39)   | 0.2869  | 0.69 (0.21, 2.27)   | 0.5303  | 0.71 (0.30, 1.72)   | 0.4435  |
| Education               | ≤ HS               | REF                 |         |                     |         |                     |         |
|                         | Some College       | 1.10 (0.85, 1.43)   | 0.4568  | 0.67 (0.42, 1.07)   | 0.0928  | 1.58 (1.19, 2.11)   | 0.0023  |
|                         | ≥ Bachelors Degree | 0.80 (0.62, 1.02)   | 0.0742  | 0.74 (0.49, 1.10)   | 0.1344  | 0.79 (0.56, 1.12)   | 0.1745  |
| Current Smoking         | No                 | REF                 |         |                     |         |                     |         |
|                         | Yes                | 2.54 (2.06, 3.14)   | <0.0001 | 2.25 (1.61, 3.13)   | <0.0001 | 2.57 (2.00, 3.30)   | <0.0001 |
|                         | Alcohol (iui gm)   | 1.00 (1.00, 1.01)   | 0.1052  | 1.00 (1.00, 1.01)   | 0.0983  | 1.00 (0.99, 1.01)   | 0.8066  |
| Physical Activity Level | Sedentary          | REF                 |         |                     |         |                     |         |
|                         | Moderate           | 0.80 (0.64, 1.00)   | 0.0500  | 0.71 (0.51, 0.99)   | 0.0434  | 0.91 (0.68, 1.23)   | 0.5292  |
|                         | Vigorous           | 0.58 (0.45, 0.76)   | 0.0001  | 0.56 (0.35, 0.89)   | 0.0156  | 0.64 (0.49, 0.86)   | 0.0031  |
|                         | BMI (kg/m**2)      | 1.02 (1.00, 1.04)   | 0.0402  | 1.02 (0.99, 1.05)   | 0.2833  | 1.01 (0.99, 1.04)   | 0.2427  |

iui: individual usual intakeSupplemental

Supplemental Table S3. Cancer Mortality Beta Coefficients for Associations with Low Calorie Sweeteners, 1988-2018.

|                   | Modeling Variable  | 19+ y               |         | 19-50 y             |         | 51+ y               |         |
|-------------------|--------------------|---------------------|---------|---------------------|---------|---------------------|---------|
|                   |                    | HR (LCL 95, UCL 95) | P       | HR (LCL 95, UCL 95) | P       | HR (LCL 95, UCL 95) | P       |
|                   | Age                | 1.09 (1.08, 1.09)   | <0.0001 | 1.11 (1.09, 1.13)   | <0.0001 | 1.07 (1.06, 1.08)   | <0.0001 |
| LCS Intake        | Quartile = 1       |                     |         |                     |         |                     |         |
|                   | Quartile = 2       | 0.81 (0.65, 1.01)   | 0.0638  | 0.61 (0.33, 1.13)   | 0.1137  | 0.84 (0.67, 1.06)   | 0.1378  |
|                   | Quartile = 3       | 0.79 (0.63, 0.99)   | 0.0447  | 0.68 (0.40, 1.16)   | 0.1584  | 0.84 (0.67, 1.06)   | 0.1463  |
|                   | Quartile = 4       | 0.85 (0.64, 1.11)   | 0.2271  | 0.89 (0.53, 1.51)   | 0.6747  | 0.77 (0.57, 1.05)   | 0.1032  |
| Gender            | Female             | REF                 |         |                     |         |                     |         |
|                   | Male               | 1.50 (1.30, 1.74)   | <0.0001 | 0.97 (0.72, 1.31)   | 0.8327  | 1.80 (1.53, 2.11)   | <0.0001 |
| Ethnicity         | White              | REF                 |         |                     |         |                     |         |
|                   | Black              | 1.14 (0.98, 1.32)   | 0.0850  | 1.08 (0.85, 1.38)   | 0.5096  | 1.16 (0.96, 1.40)   | 0.1144  |
|                   | Mexican American   | 0.80 (0.65, 0.98)   | 0.0301  | 0.66 (0.48, 0.90)   | 0.0090  | 0.89 (0.68, 1.18)   | 0.4256  |
|                   | Other Hispanic     | 0.63 (0.44, 0.90)   | 0.0105  | 0.18 (0.06, 0.53)   | 0.0018  | 0.90 (0.63, 1.29)   | 0.5669  |
|                   | Other              | 0.76 (0.49, 1.18)   | 0.2157  | 0.57 (0.24, 1.39)   | 0.2166  | 0.86 (0.51, 1.45)   | 0.5631  |
| Education         | ≤ HS               | REF                 |         |                     |         |                     |         |
|                   | Some College       | 0.94 (0.79, 1.13)   | 0.5254  | 0.67 (0.48, 0.96)   | 0.0278  | 1.06 (0.86, 1.30)   | 0.5744  |
|                   | ≥ Bachelors Degree | 0.88 (0.73, 1.06)   | 0.1777  | 0.61 (0.43, 0.88)   | 0.0075  | 0.96 (0.76, 1.21)   | 0.7241  |
| Current smoking   | No                 | Ref                 |         |                     |         |                     |         |
|                   | Yes                | 2.68 (2.29, 3.13)   | <0.0001 | 2.30 (1.75, 3.00)   | <0.0001 | 2.65 (2.19, 3.21)   | <0.0001 |
| Alcohol (iui gm)  |                    | 1.00 (1.00, 1.01)   | 0.1612  | 1.00 (1.00, 1.01)   | 0.2266  | 1.00 (1.00, 1.01)   | 0.4479  |
| Physical Activity | Sedentary          | Ref                 |         |                     |         |                     |         |
|                   | Moderate           | 0.88 (0.75, 1.03)   | 0.1151  | 0.67 (0.50, 0.89)   | 0.0059  | 0.99 (0.81, 1.22)   | 0.9385  |
|                   | Vigorous           | 0.74 (0.61, 0.90)   | 0.0026  | 0.61 (0.42, 0.87)   | 0.0068  | 0.84 (0.68, 1.04)   | 0.1093  |
|                   |                    |                     |         |                     |         |                     |         |
|                   | BMI (kg/m**2)      | 1.01 (1.00, 1.02)   | 0.2281  | 1.01 (0.98, 1.03)   | 0.6399  | 1.00 (0.99, 1.02)   | 0.5685  |

iui: individual usual intake
